# Supplementary material
Source: HighWire-hosted journal article supplement (https://erj.ersjournals.com/content/55/2/1900827)
Supplement: inline-supplementary-material-2 [file inline-supplementary-material-2.pdf]

# Supplemental Figure 1

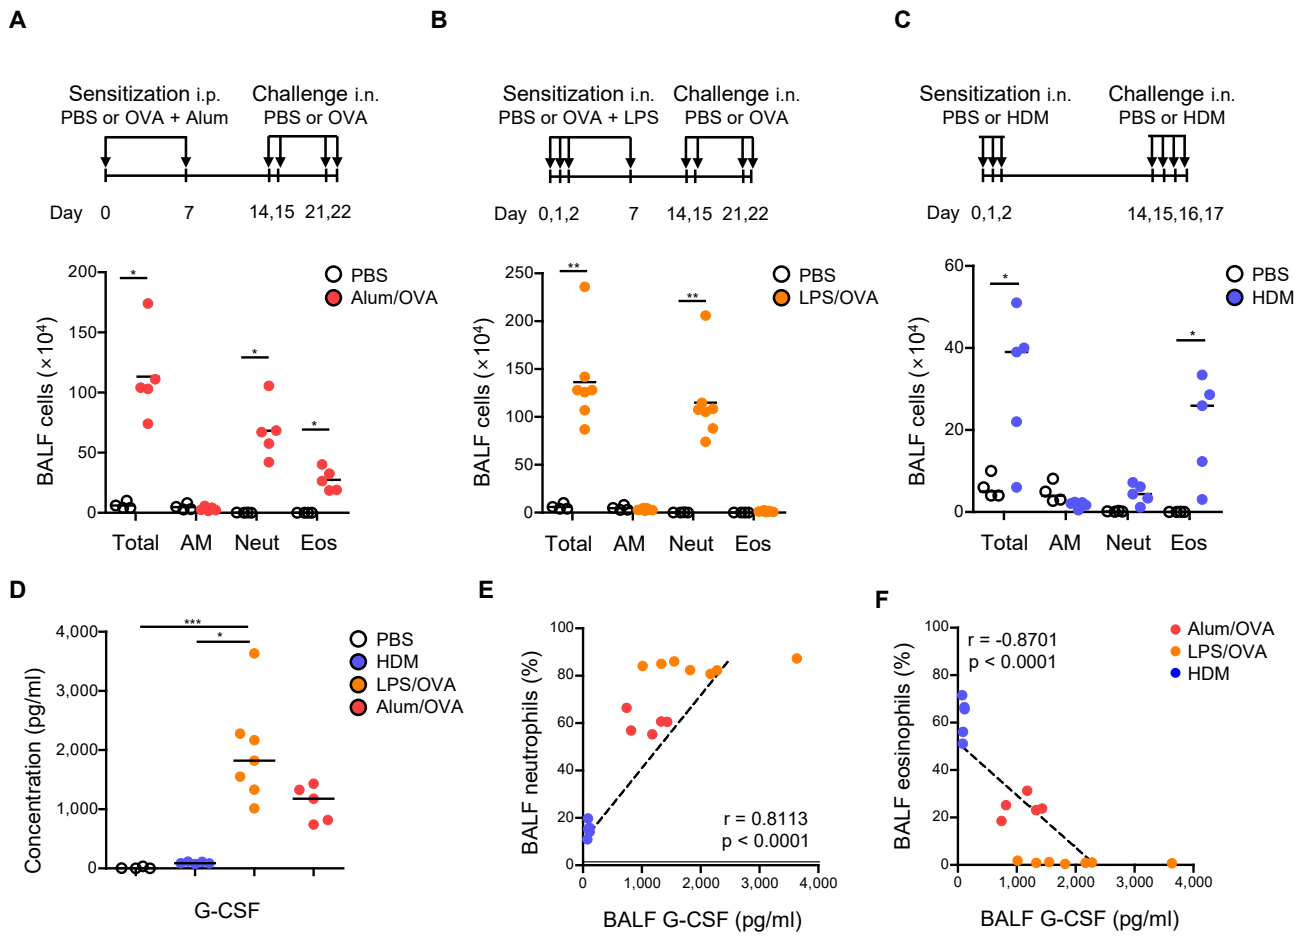



# Supplemental Figure 2

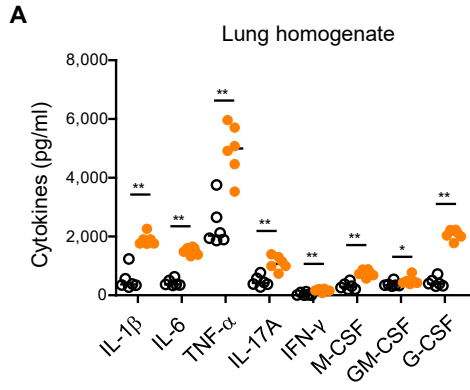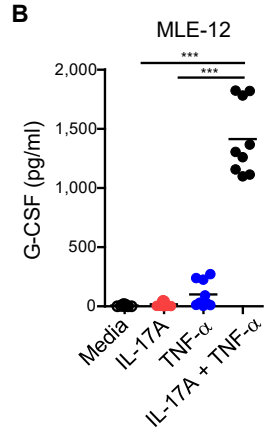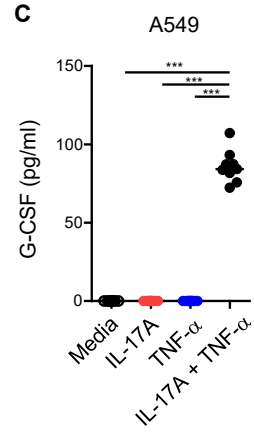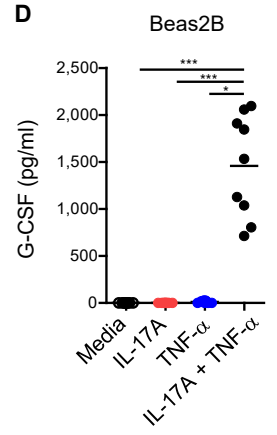

# Supplemental Figure 3

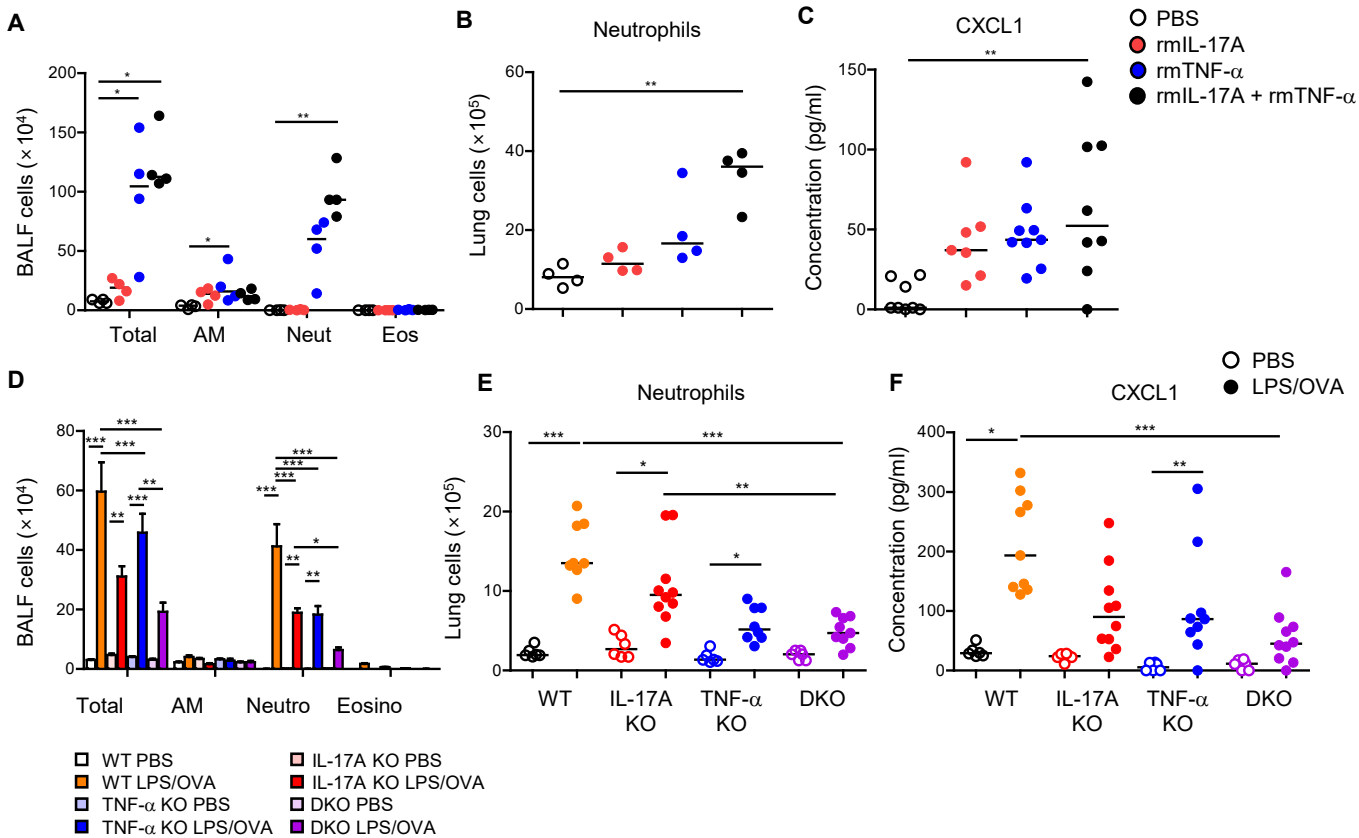

# Supplemental Figure 4

**A**

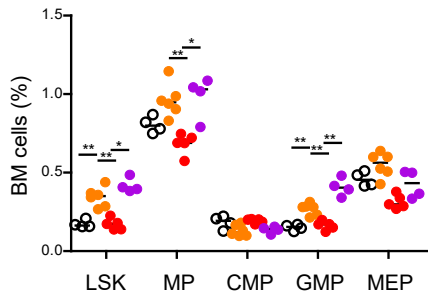

**B**

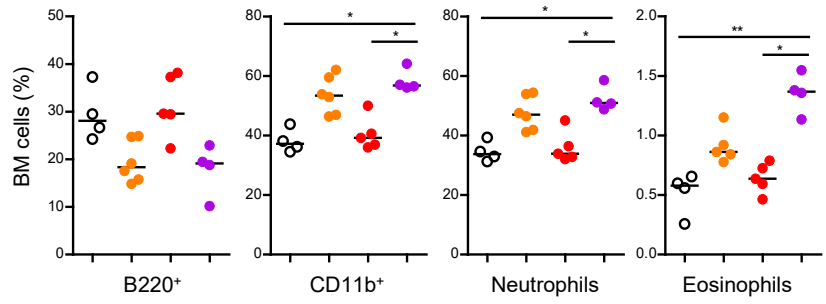

**C**

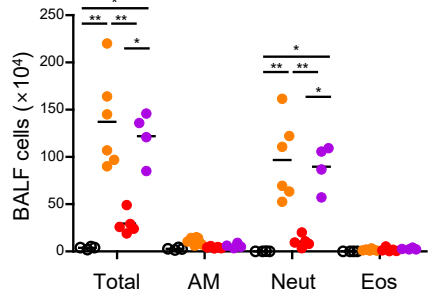

**D**

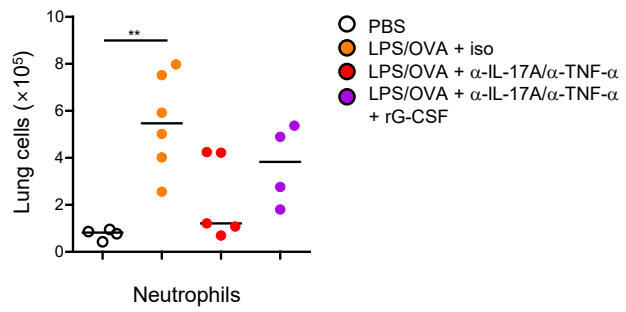

○ PBS  
 ● LPS/OVA + iso  
 ● LPS/OVA +  $\alpha$ -IL-17A/ $\alpha$ -TNF- $\alpha$   
 ● LPS/OVA +  $\alpha$ -IL-17A/ $\alpha$ -TNF- $\alpha$  + rG-CSF

# Supplemental Figure 5

**A**

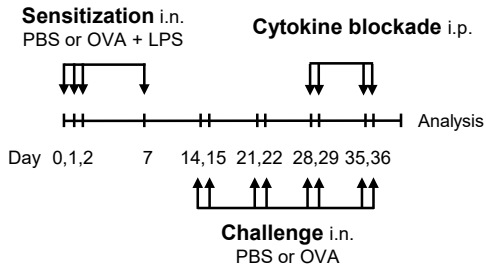

**B**

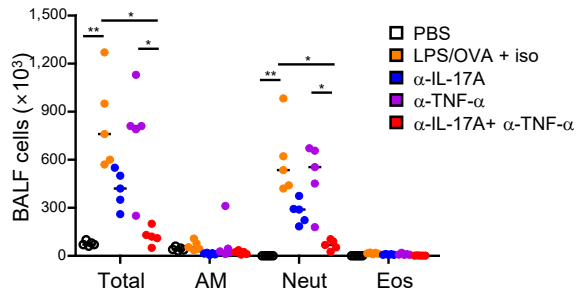

**C**

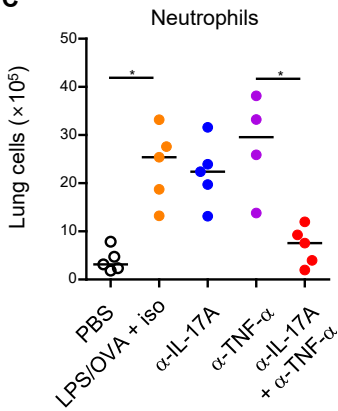

**F**

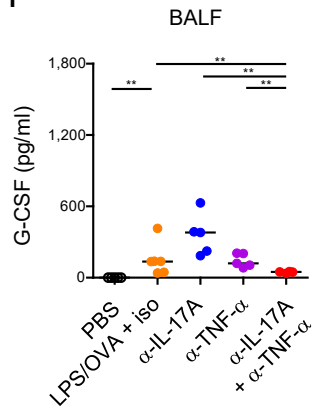

**G**

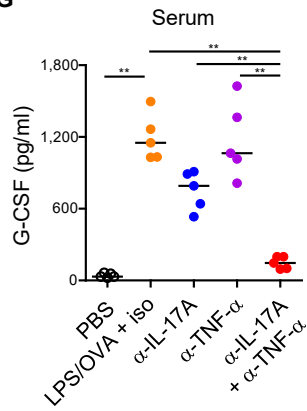

**H**

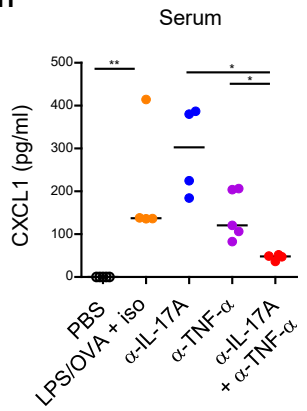

**D**

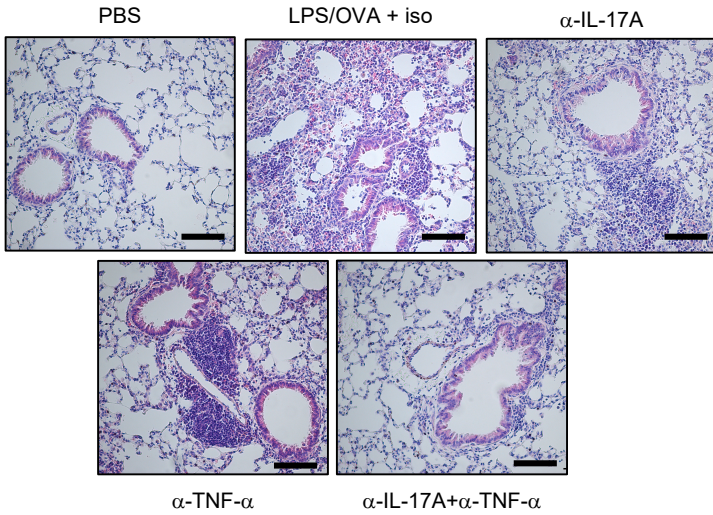

**E**

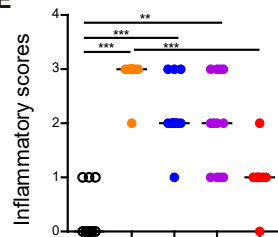

Supplemental Figure 6

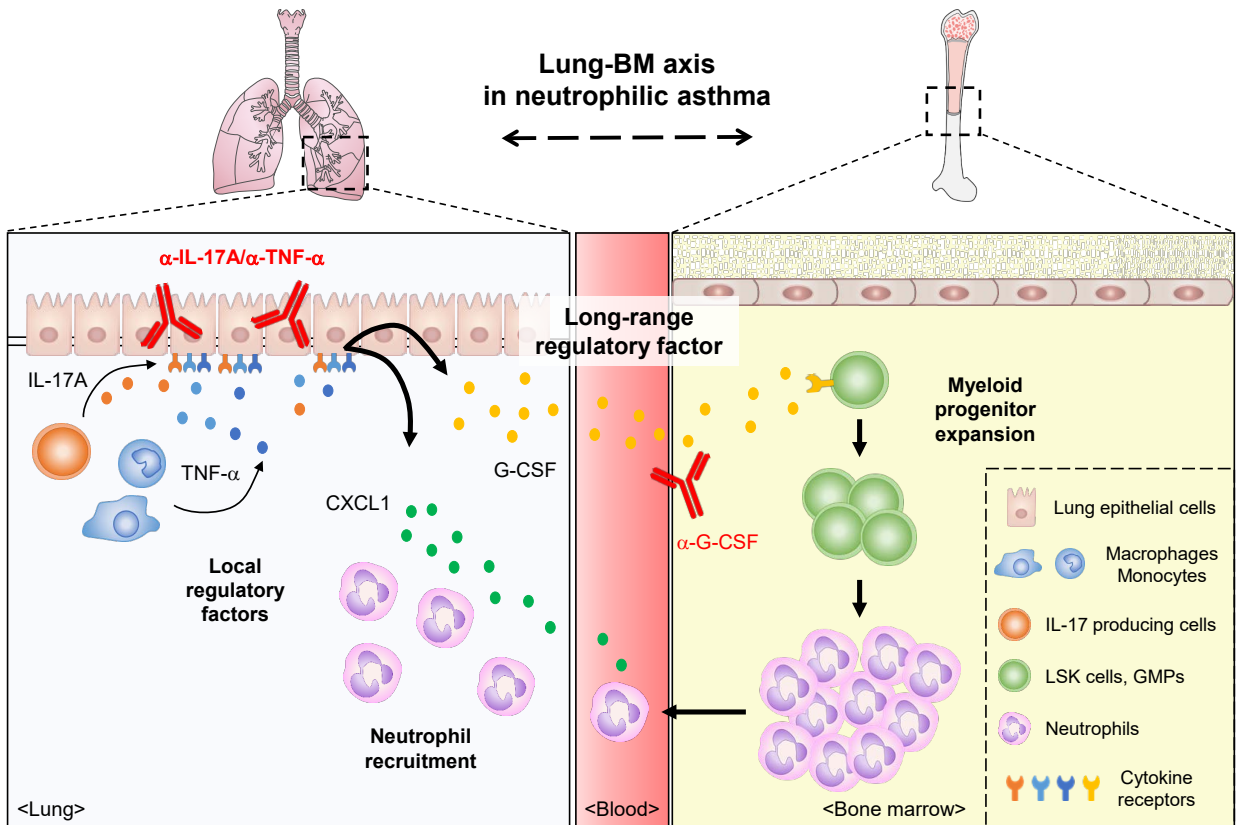

# Supplemental Table 1

| Clinical parameters                                          | Mixed              | Neutrophilic        | Eosinophilic          | p-value     |
|--------------------------------------------------------------|--------------------|---------------------|-----------------------|-------------|
| Number of subjects                                           | 64                 | 95                  | 56                    | -           |
| Gender, males/females                                        | 26/38              | 51/44               | 23/33                 | 0.1719      |
| Age at first visit, years                                    | 57.5(45.75-72)     | 66(56-76) *         | 53(21-84) ¥           | 0.000022    |
| Age at onset of asthma, years                                | 47.18(30.85-58.34) | 51.58(37.03-61.52)  | 39.58(17.38-73.94)    | 0.0131      |
| Smoking status, NS/ES/CS                                     | 45/3/16            | 51/7/37             | 37/3/16               | 0.2821      |
| Cigarettes smoked, pack years                                | 0(0-1)             | 0(0-17.5)           | 0(0-100)              | 0.0396      |
| Atopy (Y/N/ND)                                               | 37/24/3            | 30/57/8             | 32/20/4 ¥             | 0.0054      |
| BMI, kg/m <sup>2</sup>                                       | 24.22(21.66-25.9)  | 24.95(22.7-26.52)*  | 23.01(16.14-32.28) ¥  | 0.0091      |
| Initial FEV1, % predicted                                    | 81.5(45-148)       | 78(38-119)          | 83(46-113)            | 0.1604      |
| Initial FVC, % predicted                                     | 79.5(31-140)       | 77(23-125)          | 80(33-120)            | 0.298       |
| Initial FEV1/FVC, % predicted                                | 75(67.75-80)       | 72(63.5-82)         | 76.5(41-99)           | 0.1857      |
| Number(%) of subjects undergoing >12% PFT2<br>_FEV1 in table | 19(29.7%)          | 24(25.3%)           | 11(19.6%)             | 0.4484      |
| Number(%) of subjects undergoing <10% PC20<br>in table       | 19(29.7%)          | 29(30.5%)           | 15(26.8%)             | 0.8849      |
| PC <sub>20</sub> metacholine, mg/mL                          | 6.33(0.93-20.85)   | 7.47(1.65-25)       | 3.88(0.08-25)         | 0.0424      |
| Use of inhaled steroids (µg/day)                             | 500(160-520)       | 380(200-600)        | 535(160-1600)         | 0.6072      |
| Use of systemic steroids (mg/day)                            | 660(312.5-1987.5)  | 550(250-1530)       | 770(10-9500)          | 0.5494      |
| <b>Sputum profiles</b>                                       |                    |                     |                       |             |
| Sputum Total cell<br>(x10 <sup>5</sup> /ml)                  | 4.9(2-10)          | 3.2(1.5-7)          | 3(0.2-50)             | 0.3028      |
| Macrophage (%)                                               | 4.16(1.88-8.38)    | 6.75(3.13-17.25) *  | 10.73(0-91.89) * ¥    | 0.001       |
| Neutrophil (%)                                               | 83.83(77-88.88)    | 88.5(78.84-95.75) * | 39.12(3.38-58.67) * ¥ | 1.20987E-28 |
| Eosinophil (%)                                               | 7.21(4.24-12.43)   | 0(0-1.13) *         | 37.25(4.73-81.89) * ¥ | 8.51189E-40 |
| Lymphocyte (%)                                               | 0(0-0.76)          | 0(0-0.25)           | 0(0-11)               | 0.9647      |
| Columnar cells (%)                                           | 0(0-0)             | 0(0-0)              | 0(0-4.8)              | 0.6074      |
| Annual exacerbation rate                                     | 0.12(0-0.54)       | 0.12(0-0.43)        | 0(0-3.44)             | 0.9886      |
